# Supplementary material
Source: bioRxiv or medRxiv preprint supplement (https://www.medrxiv.org/highwire/filestream/79006/field_highwire_adjunct_files/0/2020.04.28.20074302-1.pdf)
Supplement: Supplementary file [file 2020.04.28.20074302-1.pdf]

**Stress-assessment questionnaire associated with new pandemic infection  
COVID-19**

1. Sociodemographic data

- Sex (male/female)
- Age
- Education level
- Family status
- Occupation
- City of residence
- What affective disorders do you have (none, Bipolar affective disorder, Major depressive disorder, Generalised anxiety disorder, Panic disorder, Cyclothymia, Dysthymia)
- What somatic disorders do you have (nothing or list)

2. Distress associated with COVID-19

a) During the last 7 days i track COVID-19 information in the media and on the Internet:

- 8) hourly
- 7) 4-5 times a day
- 6) 2 times daily (in the morning and in the evening)
- 5) 1 time daily
- 4) 4-5 times a week
- 3) 2-3 times a week
- 2) once
- 1) never

b) In relation to the announced coronavirus pandemic (COVID-19), you are most concerned about:

|                                            | Definitely not | Somewhat no | Somewhat yes | Yes | Definitely yes |
|--------------------------------------------|----------------|-------------|--------------|-----|----------------|
| Contagiousness of the virus                |                |             |              |     |                |
| Risk of isolation                          |                |             |              |     |                |
| Absence of specific treatment for COVID-19 |                |             |              |     |                |

|                                              |  |  |  |  |  |
|----------------------------------------------|--|--|--|--|--|
| Fear for own life                            |  |  |  |  |  |
| Risk to the lives and health of relatives    |  |  |  |  |  |
| Possible financial difficulties              |  |  |  |  |  |
| Severe social consequences                   |  |  |  |  |  |
| Lack of safety equipment for sale            |  |  |  |  |  |
| Possible lack of medication for daily intake |  |  |  |  |  |
| Impossibility of traditional way of life     |  |  |  |  |  |

c) What methods of disease prevention do you use?

|                              | Yes | No |
|------------------------------|-----|----|
| Wearing a mask or respirator |     |    |
| Use of gloves                |     |    |
| Use of antiseptics           |     |    |
| Hand washing                 |     |    |
| Social distance              |     |    |
| Self isolation               |     |    |
